# Functional Enhancement of AT1R Potency in the Presence of the TP $\alpha$ R Is Revealed by a Comprehensive 7TM Receptor Co-Expression Screen

Jonas Tind Hansen<sup>1,2</sup>, Christina Lyngsø<sup>1,2</sup>, Tobias Speerschneider<sup>1</sup>, Pernille B. L. Hansen<sup>3</sup>, Céline Galés<sup>4</sup>, David M. Weiner<sup>5</sup>, Søren P. Sheikh<sup>6</sup>, Ethan S. Burstein<sup>7</sup>, Jakob Lerche Hansen<sup>1,8\*</sup>

**1** Laboratory for Molecular Cardiology, Department of Biomedical Sciences and The Danish National Research Foundation Centre for Cardiac Arrhythmia, Faculty of Health Sciences, University of Copenhagen, Copenhagen, Denmark, **2** Department of Clinical Biochemistry, Glostrup Hospital, Glostrup, Denmark, **3** Cardiovascular and Renal Research, University of Southern Denmark, Odense C, Denmark, **4** Institut des Maladies Métaboliques et Cardiovasculaires (I2MC), Institut National de la Santé et de la Recherche Médicale, Université Toulouse III Paul Sabatier, Toulouse, France, **5** Proteostasis Therapeutics, Inc., Cambridge, Massachusetts, United States of America, **6** Department of Clinical Biochemistry and Pharmacology, Laboratory for Molecular and Cellular Cardiology, Odense University Hospital, Odense, Denmark, **7** ACADIA Pharmaceuticals, Inc., San Diego, California, United States of America, **8** Diabetes NBEs and Obesity biology, Novo Nordisk, Måløv, Denmark

## Abstract

**Background:** Functional cross-talk between seven transmembrane (7TM) receptors can dramatically alter their pharmacological properties, both *in vitro* and *in vivo*. This represents an opportunity for the development of novel therapeutics that potentially target more specific biological effects while causing fewer adverse events. Although several studies convincingly have established the existence of 7TM receptor cross-talk, little is known about the frequency and biological significance of this phenomenon.

**Methodology/Principal Findings:** To evaluate the extent of synergism in 7TM receptor signaling, we took a comprehensive approach and co-expressed 123 different 7TM receptors together with the angiotensin II type 1 receptor (AT1R) and analyzed how each receptor affected the angiotensin II (AngII) response. To monitor the effect we used integrative receptor activation/signaling assay called Receptor Selection and Amplification Technology (R-SAT). In this screen the thromboxane A<sub>2</sub> receptor (TP $\alpha$ R) was the only receptor which significantly enhanced the AngII-mediated response. The TP $\alpha$ R-mediated enhancement of AngII signaling was significantly reduced when a signaling deficient receptor mutant (TP $\alpha$ R R130V) was co-expressed instead of the wild-type TP $\alpha$ R, and was completely blocked both by TP $\alpha$ R antagonists and COX inhibitors inhibiting formation of thromboxane A<sub>2</sub> (TXA<sub>2</sub>).

**Conclusions/Significance:** We found a functional enhancement of AT1R only when co-expressed with TP $\alpha$ R, but not with 122 other 7TM receptors. In addition, the TP $\alpha$ R must be functionally active, indicating the AT1R enhancement is mediated by a paracrine mechanism. Since we only found one receptor enhancing AT1R potency, our results suggest that functional augmentation through 7TM receptor cross-talk is a rare event that may require specific conditions to occur.

**Citation:** Hansen JT, Lyngsø C, Speerschneider T, Hansen PBL, Galés C, et al. (2013) Functional Enhancement of AT1R Potency in the Presence of the TP $\alpha$ R Is Revealed by a Comprehensive 7TM Receptor Co-Expression Screen. PLoS ONE 8(3): e58890. doi:10.1371/journal.pone.0058890

**Editor:** Roland Seifert, Medical School of Hannover, United States of America

**Received:** November 23, 2012; **Accepted:** February 7, 2013; **Published:** March 14, 2013

**Copyright:** © 2013 Hansen et al. This is an open-access article distributed under the terms of the Creative Commons Attribution License, which permits unrestricted use, distribution, and reproduction in any medium, provided the original author and source are credited.

**Funding:** This work was supported by The Danish Council for Independent Research | Medical Sciences, the Danish National Research Foundation, The Købmand i Odense Johan og Hanne Weimann f. Seedorffs legat, and The Novo Nordisk Foundation. The funders had no role in study design, data collection and analysis, decision to publish, or preparation of the manuscript.

**Competing Interests:** The authors have read the journal's policy and have the following conflicts. JLH is an employee of Novo Nordisk and owns stock in Novo Nordisk. ESB is an employee of ACADIA Pharmaceuticals Inc. and owns stock in ACADIA. RSAT™ is a patented functional screening technology owned by ACADIA. This does not alter the authors' adherence to all the PLOS ONE policies on sharing data and materials.

\* E-mail: JLHH@novonordisk.com

## Introduction

The angiotensin II type 1 receptor (AT1R) belongs to the super-family of seven-transmembrane (7TM) or G protein coupled receptors (GPCRs). AT1R is a key regulator of blood pressure and salt and water homeostasis in the Renin-Angiotensin System (RAS). The receptor is implicated in renal and cardiovascular pathophysiology and modern drug therapy involves the use of AT1R blockers and inhibitors of the angiotensin-converting enzyme [1,2,3].

During the last two decades the concept of what constitutes a functional entity of 7TM receptors has evolved from a simplistic one receptor:one G protein system. Several studies show that receptors can cooperate either through physical interaction as dimers or higher order oligomers, or by employing functional cross-talk between non-attached receptors [4,5,6,7]. The interplay between particular receptors can modify the response from either or both/all receptors to stimuli encountered by the cell. This may have implications for drug development by allowing the design of drugs that target specific sub-populations of receptors [8].

For the AT1R several examples of both homo- and heterodimers as well as functional cross-talk have been reported. AT1R homo-dimerization has been shown in a number of studies [9,10,11]. Regarding heterodimers, it has been shown that the AT1R decreases G $\alpha_q$  coupling when the receptor interacts with either Ang(1–7) receptor (MAS) or angiotensin II type 2 (AT2) receptor [12,13,14,15] and AT2R cross-inhibits AT1R internalization [16]. Additionally, the AT1R has been shown to form complexes with the  $\beta$ 2-adrenergic receptor [17], physically interact with the apelin receptor [18], and form heterodimers with  $\alpha_{1D}$  adrenoceptor during pregnancy-induced hypertension [19]. The AT1R was also proposed to form heterodimers with the Bradykinin B2 receptor [20], but this finding has failed to be reproduced in several other laboratories [21,22].

Modification of signal transduction cascades also occurs between receptors that do not physically interact as a consequence of paracrine mechanisms. This was elegantly shown by Turu et al. in which the CB $_1$  cannabinoid receptor was activated by the AT1R through a paracrine transactivation mechanism [5]. In addition, dopamine D1/D3/D5 receptors may also modify AT1R signaling, but the mechanism underlying these effects remains to be determined [23,24,25].

To investigate how widespread 7TM receptor cross-talk actually is, we utilized a high-throughput system called Receptor Selection and Amplification Technology (R-SAT) [27,31]. Previously we have shown that R-SAT is effective in detecting functional interactions between receptors and that it also allows for large scale screening [21,26,27]. In this study, we used R-SAT in combination with other techniques to analyze how co-expression of 123 individual 7TM receptors influenced the signaling properties of the AT1R.

## Materials and Methods

### Materials

Angiotensin II (A9525) and 9,11-Dideoxy-11 $\alpha$ ,9 $\alpha$ -epoxymethanoprostaglandin F2 $\alpha$  (U46619) (D8174) were purchased from Sigma Aldrich, SQ29548 (19025) was purchased from Cayman Chemical, *myo*-[2- $^3$ H]inositol was purchased from Amersham Biosciences, Coelenterazine 400a (DeepBlueC<sup>TM</sup>) (C-7011) and Coelenterazine h (C-7004) were purchased from Biosynth.

### Recombinant DNA Plasmids

The enhanced GFP-tagged bovine  $\beta$ -arrestin2 plasmid and AT1R-*Rluc* plasmid constructs were described previously as well as the rAT1aR and the hAT1R-pSI plasmids [9,28]. Plasmids encoding G $\beta$ 1, GFP10-G $\gamma$ 2, G $\alpha$ -*Rluc*8, TP $\alpha$ R, and TP $\alpha$ R-*Rluc* were previously reported [29,30]. The sequence of all constructs was verified by sequencing.

### Cell Culture and Transfection

Human embryonic kidney 293 cells (HEK 293) and COS-7 cells were maintained in Dulbecco's modified Eagle medium (DMEM) Glutamax supplemented with 10% (v/v) foetal bovine serum (FBS), and 100 units/mL-1 penicillin/streptomycin at 37°C in 5% CO $_2$  atmosphere.

Transient transfection were performed 24 hours after cell seeding with Polyethylenimine (PEI, Polysciences Inc.) or Lipofectamine2000 (Invitrogen) according to manufacturer's protocol. Within experiments the total concentration of DNA was kept constant by adding appropriate amount of vector pCDNA3.1 plasmid.

### Receptor Selection and Amplification Technology (R-SAT)

The R-SAT assay utilizes the growth characteristics of NIH3T3 cells. Normally, NIH3T3 cells become contact inhibited upon reaching confluency. Transiently expressed oncogenes, proto-oncogenes, and many 7TM receptors confer partial or total transformation of these cells, causing a loss of contact inhibition and allowing them to continue to proliferate beyond this point [27,31]. In R-SAT, a reporter gene (in this case  $\beta$ -galactosidase) is co-transfected with the 7TM receptor of interest. The  $\beta$ -galactosidase reporter is constitutively expressed and does not participate in driving the biological response, but rather works as an indirect quantitative measure of proliferation [27]. The R-SAT assay was performed as previously described [28,32]. Briefly, NIH3T3 cells at 70 to 80% confluence in DMEM supplemented with 10% FBS, penicillin (100 U/ml), streptomycin (100 g/ml) were transfected with human AT1R cDNA alone or in combination with the 7TM receptor of interest (5 ng of receptor/well and 20 ng of  $\beta$ -galactosidase reporter/well of a 96-well plate) using the PolyFect Reagent (QIAGEN, Valencia, CA) as described in the manufacturer's protocol. One day after transfection, ligands were added in DMEM supplemented with 10% FBS, penicillin (100 U/ml), streptomycin (100 g/ml), and 2% Cytos-SF3. After 6 days, the media was aspirated and cells lysed. O-nitrophenyl- $\beta$ -D-galactopyranoside was added, and the resulting absorbance was measured spectrophotometrically. All concentration–response curves were performed in duplicate.

### IP Accumulation

4.0 million HEK293 cells were seeded into a p10 dish and grown in DMEM supplemented with 10% FBS, penicillin (50 units/mL), streptomycin (50 units/mL) and glutamine (2 mM). After 24 h, the cells were transfected using PEI. The next day cells were split into poly-D-lysine coated 96-well plates (50,000 cells/well) in inositol-free DMEM supplemented with non-essential amino acids, 10% FCS and *myo*-[2- $^3$ H]inositol (2  $\mu$ L/mL medium) (Amersham Biosciences). Cells were stimulated with increasing concentrations of ligands for 20 minutes at 37°C. Ligands were removed, and cells were incubated on ice with formic acid (10 mM) for at least 45 min. 20  $\mu$ L of the lysis solution was transferred to a solid white 96-well plate, and 80  $\mu$ L of freshly diluted SPA YSi beads (12 mg/mL) were added. The plates were shaken vigorously on a shaker for half an hour, and incubated for at least 8 hours at room temperature. Scintillation was measured on Perkin Elmer MicroBeta2 counter.

### Bioluminescence Resonance Energy Transfer (BRET)

48 hours after transfection, HEK293 cells were washed with phosphate buffered saline (PBS), detached with PBS/Trypsin-EDTA (0.25% Trypsin; 1 mM EDTA, Invitrogen), harvested by centrifugation (5 min, 1,000g), resuspended in PBS supplemented with 0.5 mM Ca $^{2+}$  and 0.5 mM Mg $^{2+}$ , and incubated at room temperature on a shaker (app. 250 rpm) until the time of the experiments. The resuspended cells were distributed in 96-well microplates (black/white optiplate, PerkinElmer) and incubated in the presence or absence of ligands. The reading time was 15 min. after agonist addition for dose-response curves.

DeepBlueC coelenterazine (Coelenterazine 400a, Biosynth) was added two seconds before reading using an injector at a final concentration of 5  $\mu$ M. Measurement of *Renilla* Luciferase (*RLuc*)-mediated luminescence and GFP $^{2+}$ -mediated emission from each well were performed using a Tecan Infinite F500 microplate reader (Tecan Group Ltd., Männedorf, Switzerland). The BRET2 ratio was determined by calculating the ratio of the light emitted by GFP $^{2+}$  (515 nm) over the light emitted by the *RLuc* (410 nm).

For BRET1, the ratio was calculated as light emitted by YFP (530 nm) over the light emitted by the *RLuc* (470 nm). The background signal from *RLuc* was determined by co-expressing the *RLuc* construct with empty vector, and the BRET1/BRET2 ratio generated from this transfection was subtracted from all other BRET1/BRET2 ratios. Data were analyzed in Graphpad Prism and Excel. Statistical analysis was performed in Excel using Student's t-test, unpaired, two-tailed.

## Animals

Animal care followed the guidelines of the National Institutes of Health and the experimental protocol was approved by the Danish Animal Experiments Inspectorate. Studies were conducted in male and female C57Bl/6J (WT) mice (Taconic Farms Inc., Denmark). Mice had free access to rodent chow (Altromin, Lage, Germany) and tap water.

## *In vitro* Experiments: Isometric Force Measurements in Mouse Intra-renal Arteries

Intrarenal segmental artery rings were suspended in a Halpern-Mulvany wire myograph (Model 610M, Danish Myo Technology A/S, Aarhus, Denmark) and isometric force development was measured (PowerLab, ADInstruments, Colorado Springs, CO, USA). Two rings per mouse artery were incubated at 37°C in physiological salt solution [in mmol/L: NaCl 115, NaHCO<sub>3</sub> 25, MgSO<sub>4</sub> 1.2, K<sub>2</sub>HPO<sub>4</sub> 2.5, CaCl<sub>2</sub> 1.3, glucose 5.5, and HEPES 10 (control solution)] equilibrated with 5% CO<sub>2</sub> in air at pH 7.4. Then, the rings were normalized at a resting tension of approximately 13.3 mN and allowed to equilibrate for 30 minutes. Viability of the vascular smooth muscle and endothelial cells was tested by demonstrating contraction to phenylephrine (10–6 mol/L) and relaxation to acetylcholine (10–6 M), respectively.

## Statistical Analysis

All pharmacological data were analyzed using Excel (Microsoft, Redmond, WA) and Prism (GraphPad Software, San Diego, CA); R-SAT data and phosphatidyl inositol hydrolysis data were analyzed using nonlinear regression curve fitting.

## Results

### Integrative Screen for 7TM Receptors Enhancing AT1R Signaling Potency

The R-SAT screen was performed in NIH3T3 cells transiently expressing a  $\beta$ -galactosidase reporter gene as previously reported [21,26]. Initially, we performed titration experiments to determine the optimal amount plasmid to achieve robust expression of human AT1R for the co-expression analysis, but still not reach the upper limit of response, leaving a window to identify enhancements. We found transfection with 5 ng plasmid-cDNA/well met these criteria, and this amount of plasmid was consequently used in the subsequent screen (data not shown).

We then performed the co-expression R-SAT screen to find receptors with the potential to up-regulate AngII stimulated signaling of AT1R. 123 different 7TM receptors (available 7TM receptors expressed in the pSI vector (Promega) from the ACADIA pharmaceuticals Inc. plasmid database) were co-expressed with AT1R and the effect of co-expression was determined by comparing the AngII dose-response on AT1R expressed alone to AT1R co-expressed with each individual receptor. On each plate AT1R expressed alone was run in parallel to account for any plate-to-plate variation. The data from these experiments are reported in table S1 as fold increase of the EC<sub>50</sub>

of AT1R plus co-expressed receptor relative to cells expressing AT1R alone.

The result for a number of representative examples of receptor partners are showed in figure 1a to illustrate the various effects we observed as a consequence of co-expressing different receptors. Interestingly, all but one of the receptors investigated either decreased or did not significantly change the potency of AngII signaling when co-expressed. We chose not to analyze the receptors causing a decrease in AngII response further because it can be a consequence of several different factors, the most likely probably being decreased AT1R-surface expression resulting from nonspecific inhibition of cDNA transcription or AT1R protein translation.

The only receptor significantly enhancing potency of the AT1R response through co-expression was the TP $\alpha$ R. TP $\alpha$ R co-expression results in a significant 11.6 fold potency shift increasing the pEC<sub>50</sub> value from 6.4 to 7.6 (Fig. 1b). Additionally, the maximal response was lowered by approximately 49%. The mechanism underlying the drop in the maximal response is difficult to address, but it could be a consequence of a decreased AT1R surface expression as discussed above.

Since the TP $\alpha$ R enhanced AngII potency in the presence of the AT1R, we also wanted to know if AT1R co-expression influenced the potency of TP $\alpha$ R agonists as well. To do so, we analyzed the potency with the specific TP $\alpha$ R agonist U46619 in R-SAT in cells expressing the TP $\alpha$ R alone or together with the AT1R. As depicted in Fig. 1c and table 1, AT1R co-expression did not significantly change the potency of U46619. We also tested how co-expression of five other receptors with the TP $\alpha$ R influenced the potency of U46619, and there were no profound differences in TP $\alpha$ R signaling by co-expression of these receptors either (fig. 1c).

### Co-expression of TP $\alpha$ R with Various 7TM Receptors Lower Efficacy in R-SAT

Next we wanted to study if TP $\alpha$ R potentiates 7TM in general, or if it is specifically linked to the AT1R. To do so, we tested how TP $\alpha$ R co-expression affected the R-SAT response for five 7TM receptors in response to their native ligand (Fig. 2a–e and table 2) For these 7TM receptors, the TP $\alpha$ R promoted a general decrease in efficacy, while pEC<sub>50</sub> values did not change significantly (table 2). This indicates that TP $\alpha$ R does not enhance 7TM receptor signaling in general.

### TP $\alpha$ R Induced Enhancement of the AT1R Response in R-SAT is Caused by Paracrine Transactivation of the TP $\alpha$ R

To test if paracrine transactivation of the TP $\alpha$ R due to AT1R mediated TXA<sub>2</sub> release caused the increase in AngII potency at AT1R's, we applied SQ29548, Naproxen, and Flurbiprofen in combination with AngII (Fig. 3a–c and table 3). SQ29548 is a highly selective TP $\alpha$ R antagonist [33], while both Naproxen and Flurbiprofen are non-selective COX inhibitors that work by inhibiting both the COX-1 and COX-2 enzymes responsible the synthesis of the TP receptor agonist TXA<sub>2</sub> [34].

When TP $\alpha$ R and AT1R where co-expressed all three blockers caused a significant decrease in potency for AngII. Without any inhibitors present, the pEC<sub>50</sub> value of AngII was 7.6 $\pm$ 0.1. But in the presence of inhibitors the pEC<sub>50</sub> values dropped to 6.5 $\pm$ 0.1 for SQ29548, 6.4 $\pm$ 0.1 for Naproxen, and 6.7 $\pm$ 0.2 for Flurbiprofen, respectively (Fig. 3a–c and table 3). In comparison, the inhibitors only had a weak reduction of AT1R response when expressed alone. When the AT1R was expressed alone the pEC<sub>50</sub> for AngII curve was 6.4 $\pm$ 0.1 without any inhibitors present. In the presence of inhibitors pEC<sub>50</sub> was slightly reduced; for SQ29548 to 5.9 $\pm$ 0.1,

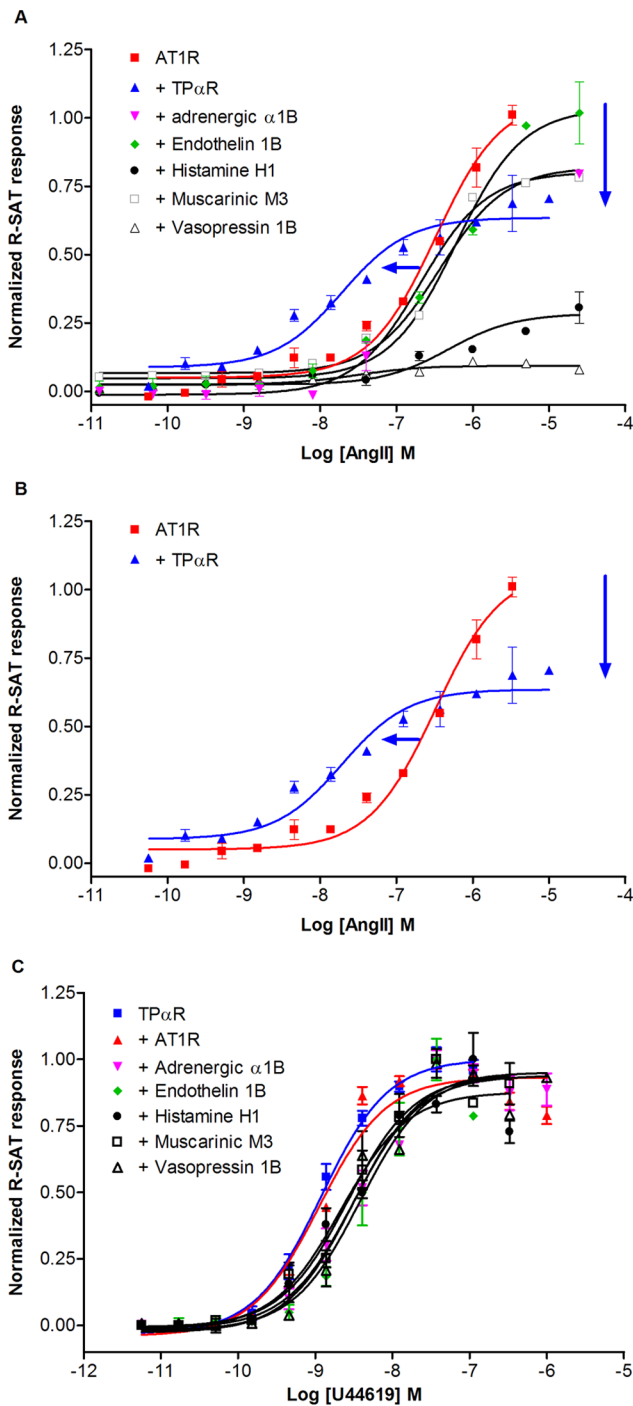

**Figure 1. AngII response of co-expression of the AT1R with various 7TM receptors determined by R-SAT assay.** AT1R or TP $\alpha$ R were transiently co-expressed in NIH3T3 cells together with of the indicated 7TM receptors and ligand-induced responses determined using R-SAT as described in the methods. Data shown are normalized to the maximal response of AT1R or TP $\alpha$ R alone. **A**, The AT1R was screened against 123 different 7TM receptors, shown are representative dose-response curves after stimulation with AngII for co-expression with TP $\alpha$ R, the Adrenergic  $\alpha$ 1B, Endothelin 1B, the Histamine H1, the Muscarinic M3, and the Vasopressin V1B receptors. A complete list of data from the screened receptors is reported in table S1. **B**, AngII dose response curve for AT1R expressed alone or co-expressed with TP $\alpha$ R **C**, TP $\alpha$ R agonist response from TP $\alpha$ R co-expressed with the Adrenergic  $\alpha$ 1B, Endothelin 1B, the Histamine H1, the Muscarinic M3, and the

Vasopressin V1B receptors. Average pEC<sub>50</sub> ( $\pm$ S.D.) values and the number of experiments are reported in Table 1. doi:10.1371/journal.pone.0058890.g001

Naproxen to  $5.8 \pm 0.1$ , and Flurbiprofen to  $6.2 \pm 0.2$ . This suggest, that the enhancement in AT1R response in the presence of TP $\alpha$ R might be caused by a long-term paracrine release of TP $\alpha$ R agonist in R-SAT, which can be inhibited by the presence of TP $\alpha$ R antagonist or TP $\alpha$ R ligand synthesis inhibitors.

The loss-of-function mutant TP $\alpha$ R R130V, has a mutation causing G protein uncoupling. The mutation is situated in the conserved E/DRY motif located at the boundary between transmembrane domain 3 and the second intracellular loop [35,36]. A previous study has shown that the R130V mutant is expressed at similar level as the TP $\alpha$ R wild type [35] and we have tested the expression of the luciferase tagged TP $\alpha$ R wild type and R130V mutant receptor using luciferase measurement, where we find that the luciferase tagged R130V mutant expressed 123%  $\pm$ 4% of the wild type luciferase tagged TP $\alpha$ R (data not shown). Accordingly, the R130V mutant receptor can be used to decipher the importance of receptor expression vs. signaling activity for the gain-of-function event. As depicted in figure 3d and table 3 this mutant has a significantly decreased response in R-SAT. The mutant was used to test if mere presence of TP $\alpha$ R is sufficient to potentiate AT1R-signaling. As depicted in fig 3a-d co-expression of TP $\alpha$ R R130V instead of wild-type TP $\alpha$ R's reduced the enhancement of AngII potency. These results indicate that presence of fully active TP $\alpha$ R, is necessary to promote a full potentiation of AngII-mediated AT1R response.

### TP $\alpha$ R does not Influence AT1R-mediated Signal Transduction in the "Short Term" Assays

To test if the TP $\alpha$ R had any direct effects on short term AngII responses of the AT1R, we first analyzed the TP $\alpha$ R effects on AT1R on the level of the individual G protein subunits. To estimate the receptor-mediated G $\alpha$  subunit activation in real time in living cells, we used a BRET assay described by Gales et al. [30,37]. When the G protein is activated a greater separation between the Rluc8-tagged G $\alpha_q$  helical domain and the GFP10-tagged G $\gamma_2$  N-terminus occurs

**Table 1.** Pharmacological properties of the TP $\alpha$ R co-expressed with empty vector or various 7TM receptors reported using R-SAT.

| Receptor                      | Additional Receptor/<br>DNA | Drug   | pEC <sub>50</sub> | n |
|-------------------------------|-----------------------------|--------|-------------------|---|
| <b>TP<math>\alpha</math>R</b> |                             |        |                   |   |
|                               | pAP4(-)                     | U44619 | 8.9 $\pm$ 0.1     | 8 |
|                               | AT1R                        | U44619 | 8.8 $\pm$ 0.1     | 6 |
|                               | Adrenergic $\alpha$ 1B      | U44619 | 8.5 $\pm$ 0.2     | 6 |
|                               | Endothelin 1B               | U44619 | 8.6 $\pm$ 0.2     | 4 |
|                               | Histamine H1                | U44619 | 8.4 $\pm$ 0.1     | 6 |
|                               | Muscarinic M3               | U44619 | 8.6 $\pm$ 0.2     | 6 |
|                               | Vasopressin 1B              | U44619 | 8.5 $\pm$ 0.1     | 4 |

NIH3T3 cells were transiently transfected with human TP $\alpha$ R co-expressed with the indicated receptors and stimulated with U44619, a TP $\alpha$ R agonist. R-SAT analysis was performed as described in the materials and methods section. The average pEC<sub>50</sub> ( $\pm$ S.D.) values and number of experiments are reported. doi:10.1371/journal.pone.0058890.t001

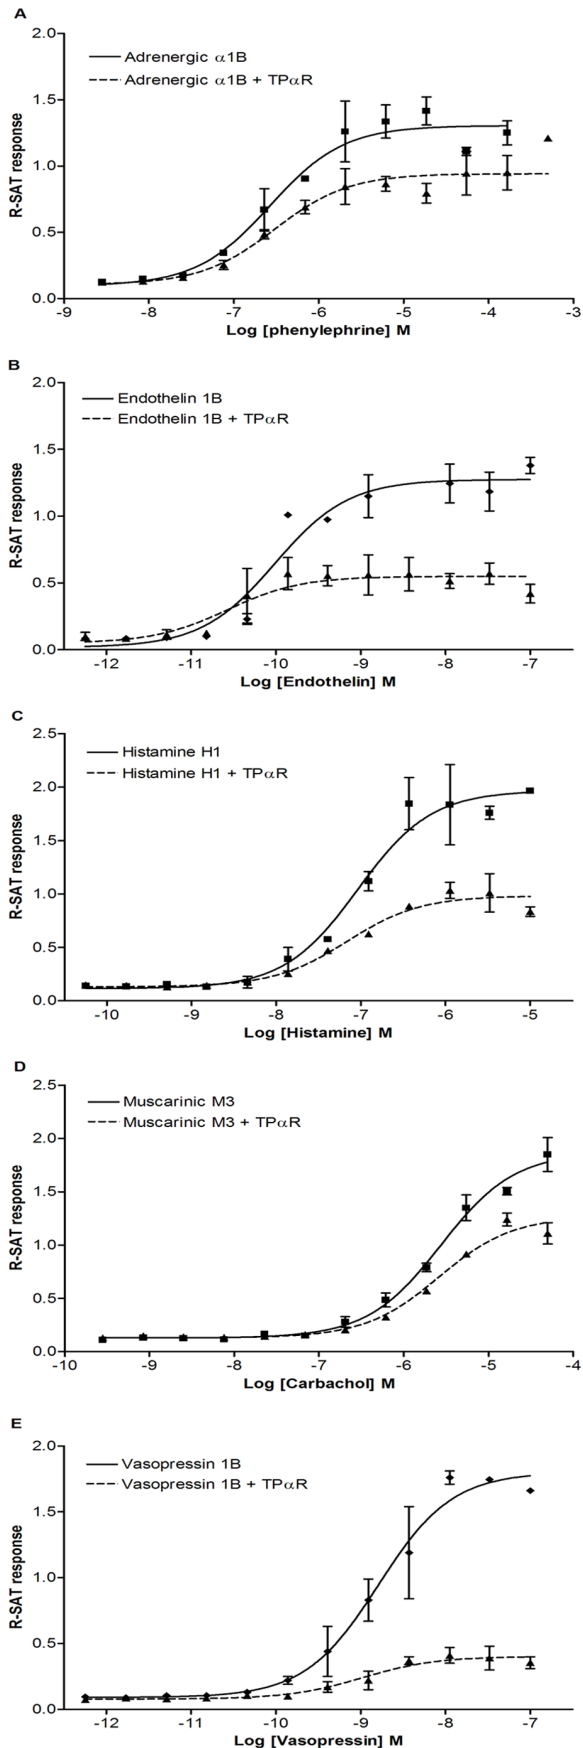

**Figure 2. Influence of TP $\alpha$ R on various 7TM receptor signaling in R-SAT.** Data shown from representative concentration-response experiments, reported as R-SAT reading. **A**, Adrenergic  $\alpha$ 1B receptor co-expressed with empty vector or TP $\alpha$ R stimulated with phenylephrine, **B**, Endothelin 1B receptor co-expressed with empty vector or TP $\alpha$ R stimulated with endothelin, **C**, Histamine H1 receptor co-expressed with empty vector or TP $\alpha$ R stimulated with histamine, **D**, Muscarinic M3 receptor co-expressed with empty vector or TP $\alpha$ R stimulated with carbachol, and **E**, Vasopressin 1B co-expressed with empty vector or TP $\alpha$ R stimulated with vasopressin. Average pEC<sub>50</sub> ( $\pm$ S.D.), and the number of experiments are reported in Table 2. doi:10.1371/journal.pone.0058890.g002

during GDP/GTP exchange [30,37]. This translates into a decrease in BRET signal following receptor activation. Therefore, this BRET assay allows to us measure conformational changes in the heterotrimeric G $\alpha\beta\gamma$  subunits, which can indicate activation of the G protein. The BRET probe-fusion of either G $\alpha_q$ , G $\alpha_{11}$ , G $\alpha_{12}$ , G $\alpha_{13}$ , G $\alpha_{12}$ , or G $\alpha_{13}$  together with G $\gamma_2$  were co-expressed together with the complementary G $\beta_1$  subunit and the untagged AT1R without or with the TP $\alpha$ R. For most G proteins we did not observe any effect the TP $\alpha$ R on AT1R induced responses. The only difference observed was on G $\alpha_q$  rearrangement. Stimulation with AngII resulted in a robust ligand-promoted decrease in the BRET signal for the probe for G $\alpha_q$  on  $-0.094 \pm 0.014$  when AT1R was expressed alone (Fig. 4a). Co-expression with the untagged TP $\alpha$ R decreased the ligand-promoted G $\alpha_q$  BRET signal to  $-0.156 \pm 0.009$ , indicating that the TP $\alpha$ R increases the G $\alpha_q$  rearrangement resulting from AngII stimulation. AngII-stimulation on the BRET probes for G $\alpha_{11}$ , G $\alpha_{12}$ , G $\alpha_{13}$ , G $\alpha_{12}$ , or G $\alpha_{13}$  did not significantly change promoted BRET signal when TP $\alpha$ R was co-expressed together with AT1R (Fig. 4a). However, as seen in figure 5b, the observed increase in G $\alpha_q$  conformational changes in presence of TP $\alpha$ R did not translate into increased IP accumulation. After stimulation with AngII, similar potencies were observed for the AT1R alone and in combination with TP $\alpha$ R (Fig. 4b). Likewise, the TP $\alpha$ R did not change the AT1R's ability to recruit  $\beta$ -arrestin. Real time BRET<sup>1</sup> monitoring of the interaction between AT1R-Rluc8 and YFP- $\beta$ -arrestin2 revealed that TP $\alpha$ R does not influence the AngII-mediated BRET signal, as AngII-stimulated AT1R-Rluc8 recruits YFP- $\beta$ -arrestin2 with similar potency as co-expression of untagged TP $\alpha$ R (Fig. 4c).

**TP $\alpha$ R Inhibitor does not Influence the Acute AngII-stimulated Contraction in Intra-renal Arteries from Mice**

Several studies suggest a functional relation between the AT1R and TP $\alpha$ R *in vivo* and furthermore it has been shown that TP $\alpha$ R inhibitors can suppress AngII-mediated responses [38,39]. These studies suggest that this effect is most likely through regulation of arterial constriction. To test if TP $\alpha$ R influences AT1R in arteries directly through a short term ligand release, we applied the TP $\alpha$ R inhibitor S18886 on AngII-stimulated arterial contraction in mice (Fig. 5a-c). AngII concentration-dependently contracted blood vessels with a pEC<sub>50</sub> value of 7.2 (data not shown). Three consecutive application of AngII led to a significant contraction with no difference between the first, second and third administration (Fig. 5a). Inhibition of TP receptors using S18886 had no significant effect on the AngII induced contraction (Fig. 5b). The contractions were significantly inhibited by losartan (Fig. 5c), which shows that TP $\alpha$ R does not influence AT1R-mediated intra-renal arterial contraction in mice in short term studies.

**Table 2.** Influence of TP $\alpha$ R on various 7TM receptor signaling in R-SAT.

| Receptor                                | Additional Receptor/DNA | Drug          | pEC <sub>50</sub> | Max response  | n  |
|-----------------------------------------|-------------------------|---------------|-------------------|---------------|----|
| <b>Adrenergic <math>\alpha</math>1B</b> |                         |               |                   |               |    |
|                                         | pAP4(-)                 | Phenylephrine | 6.0 $\pm$ 0.4     | 1.3 $\pm$ 0.1 | 5  |
|                                         | TP $\alpha$ R           | Phenylephrine | 6.0 $\pm$ 0.2     | 0.9 $\pm$ 0.1 | 4  |
| <b>Endothelin 1B</b>                    |                         |               |                   |               |    |
|                                         | pAP4(-)                 | Endothelin    | 10.2 $\pm$ 0.1    | 1.3 $\pm$ 0.1 | 5  |
|                                         | TP $\alpha$ R           | Endothelin    | 10.4 $\pm$ 0.2    | 0.6 $\pm$ 0.1 | 3  |
| <b>Histamine H1</b>                     |                         |               |                   |               |    |
|                                         | pAP4(-)                 | Histamine     | 6.9 $\pm$ 0.5     | 2.0 $\pm$ 0.1 | 10 |
|                                         | TP $\alpha$ R           | Histamine     | 6.9 $\pm$ 0.5     | 1.0 $\pm$ 0.1 | 7  |
| <b>Muscarinic M3</b>                    |                         |               |                   |               |    |
|                                         | pAP4(-)                 | Carbachol     | 5.5 $\pm$ 0.2     | 1.9 $\pm$ 0.1 | 7  |
|                                         | TP $\alpha$ R           | Carbachol     | 5.6 $\pm$ 0.2     | 1.3 $\pm$ 0.1 | 6  |
| <b>Vasopressin 1B</b>                   |                         |               |                   |               |    |
|                                         | pAP4(-)                 | Vasopressin   | 8.7 $\pm$ 0.3     | 1.8 $\pm$ 0.1 | 3  |
|                                         | TP $\alpha$ R           | Vasopressin   | 9.1 $\pm$ 0.4     | 0.4 $\pm$ 0.0 | 3  |

R-SAT measured TP $\alpha$ R transfected cells co-expressing: **(a)** Adrenergic  $\alpha$ 1B receptor stimulated with phenylephrine, **(b)** Endothelin 1B receptor stimulated with endothelin, **(c)** Histamine H1 receptor with histamine, **(d)** Muscarinic M3 receptor stimulated with carbachol, and **(e)** Vasopressin 1B stimulated with vasopressin. The R-SAT analysis was performed as described in the materials and methods section. The average pEC<sub>50</sub> ( $\pm$ S.D.) values and number of experiments are reported. doi:10.1371/journal.pone.0058890.t002

## Discussion

### Signaling Synergism between 7TM Receptors is a Rare Event in the R-SAT Assay

There are many examples in the literature of hetero-dimerization and functional cross-talk between 7TM receptors and therefore it might be expected to be a very common phenomenon [4,40,41]. Here, we attempted to analyze the frequency of “functional enhancement” for a particular receptor using the AT1R as an example. This is the first time a comprehensive and systematic investigation of the universality of functional cross-talk between 7TM receptors has been performed. The screen revealed that a number of 7TM receptors had an effect on AT1R signaling. While many 7TM receptors decreased AT1R signaling in the R-SAT assay, the TP $\alpha$ R was the only receptor amongst the 123 receptors we tested that significantly enhanced AT1R signaling (Fig. 1 and table S1). This indicates that functional synergism/potentiation between 7TM receptors is not a promiscuous event but actually requires specific conditions to occur.

The screen was performed in the R-SAT assay. This assay incorporates the combined signaling of multiple signal transduction pathways into a single homogeneous output [31]. The compatibility of R-SAT with receptors of all signaling classes, together with the simple assay format is advantageous when performing large scale screening. Previously, we have used R-SAT successfully to determine the pharmacological properties of a battery of AngII analogs, where some demonstrated increased potencies to AngII [26]. In addition, we previously used the R-SAT assay to identify a gain-of-function for the heterodimerization pair of the GABA<sub>B1</sub> and GABA<sub>B2</sub> receptors [21]. In this paper we showed that when we stimulate with the GABA ligand Baclofen on GABA<sub>B1</sub> or GABA<sub>B2</sub> receptors when expressed individually, it does not increase the R-SAT response. However, when the two receptor subunits are co-expressed, the R-SAT response shows a robust increase in signaling. This validates that the R-SAT assay can pick up heterodimerization signaling for heterodimerization

pairs. Although the assay has proven useful for studying gain-of-function events for AT1R, there are limitations. First, R-SAT does not differentiate between the specific signaling pathways involved, which means that if some receptors enhance certain AT1R signaling pathways and diminish others, the net effect might be an unaltered (or even decreased) R-SAT response. Moreover, the co-expressed receptors could enhance AT1R signaling pathways not detected by R-SAT. Secondly, it is very difficult to quantify AT1R surface expression since the receptors are transiently expressed, and their expression will change over the 6-day time course of the assay. Since co-expression of certain other receptors may decrease surface expression of the AT1R, we may have missed some gain-of-function events. In addition, differences in expression levels between the co-expressed 7TM receptors, will affect the results even though they are expressed in the same vector, they will not express at identical. Thirdly, we only performed the screen at one cDNA concentration, therefore it is possible that we could have picked up more gain-of-function events using different cDNA concentrations.

The screen also revealed a number of receptors that downregulate AT1R signaling. Based on the methodological limitations of the R-SAT assay (see above), it can be difficult to determine whether the observed downregulation of AT1R signaling is caused by a true functional receptor interaction or by a non-specific effect on cell surface expression or by transcriptional/translational quenching. However, downregulation of AT1R signaling by certain 7TM receptors like the Vasopressin 1B and Histamine H1 could be specific for the AT1R (Fig. 1a), since this downregulation was not detected when the two receptors were co-expressed with the TP $\alpha$ R (Fig. 1c). Hence, the screen contains a large number of 7TM receptor interaction data, which would be interesting to further explore in the future.

Nevertheless, we were able to reproduce a number of earlier findings demonstrating the usefulness of the approach. Firstly, a physical interaction between the Bradykinin B<sub>2</sub> receptor and AT1R has been proposed [20], but has later been disputed by



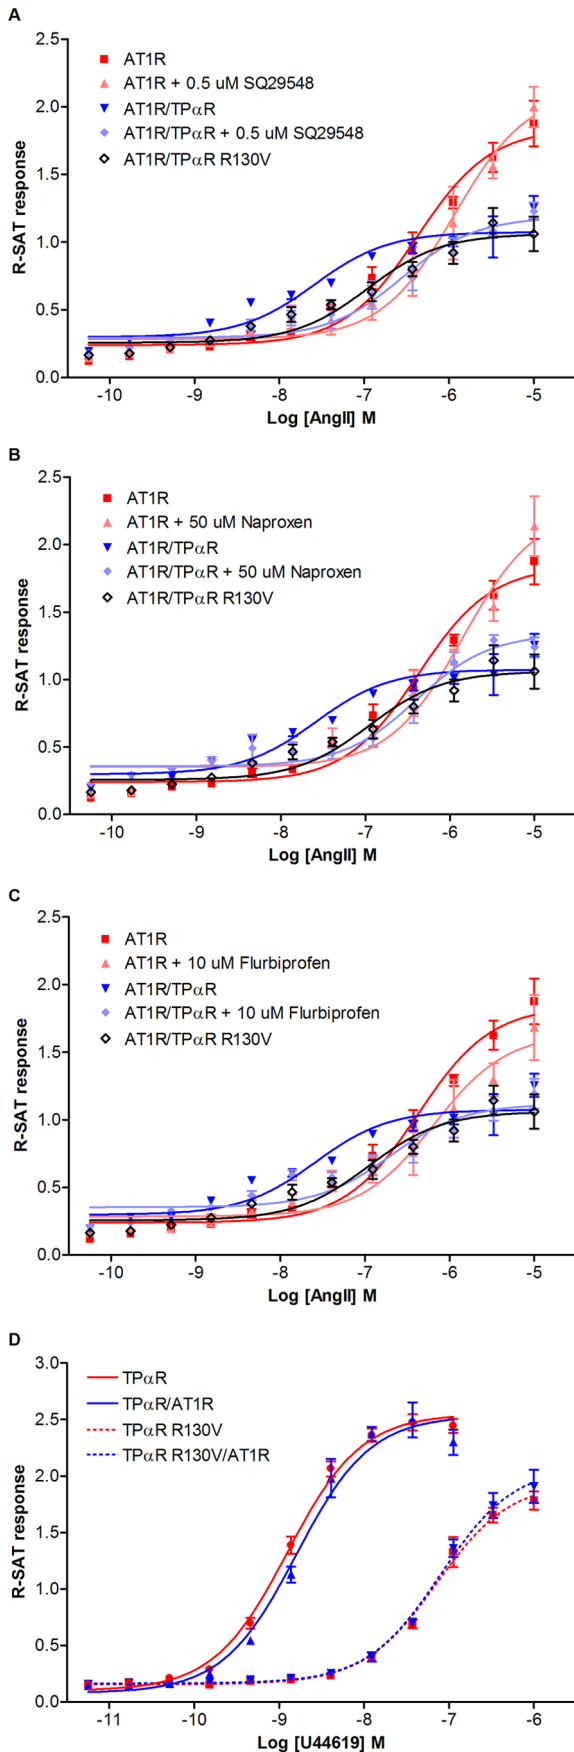

**Figure 3. Pharmacological properties of TP $\alpha$ R inhibitors in R-SAT.** NIH3T3 cells were transiently transfected with human AT1R alone or co-expressed with the TP $\alpha$ R or the mutant TP $\alpha$ R R130V. R-SAT analysis was performed as described in the materials and methods section. The NIH3T3 cells were stimulated with AngII in absence or presence of **A**, 0.5  $\mu$ M SQ29548, **B**, 50  $\mu$ M Naproxen, or **C**, 10  $\mu$ M Flurbiprofen. **D**, The TP $\alpha$ R R130V receptor was expressed alone or in combination with the AT1R and stimulated with the TP $\alpha$ R agonist, U46619, also the TP $\alpha$ R was expressed alone or in combination with AT1R and stimulated with the U46619. Data shown are from representative concentration–response experiments. Average pEC<sub>50</sub> ( $\pm$ S.D.) values and the number of experiments are reported in Table 3. doi:10.1371/journal.pone.0058890.g003

several groups using other assays [21]. As we have previously published, co-expression of Bradykinin B<sub>2</sub> receptor did not result in any increase in AngII-mediated AT1R response in this screen either (table S1) [21,22]. Secondly, AT2R is reported to inhibit AT1R signaling [15]. We observed a 6.8 fold decrease in AT1R signaling when AT2R was co-expressed with AT1R (table S1), which is in agreement with that study. Thirdly, in a study in human RPT cells it was shown that the D5, but not the D1 receptor decreases AT1R expression [25]. Consistent with that earlier study, the Dopamine D5 receptor reduced AngII-stimulated response in R-SAT.

**AT1R Activation Most Likely Mediates TXA<sub>2</sub> Synthesis, which Leads to Paracrine TP $\alpha$ R Activation**

As discussed, TP $\alpha$ R was the only 7TM receptor that significantly potentiated AT1R activation. TP $\alpha$ R and AT1R are expressed together in many different cell types and tissues [42,43],

**Table 3.** Pharmacological properties of TP $\alpha$ R inhibitors and TP $\alpha$ R agonist in R-SAT.

| Receptor                            | Additional Receptor/DNA | Drug   | Inhibitor    | pEC <sub>50</sub> | n |
|-------------------------------------|-------------------------|--------|--------------|-------------------|---|
| <b>AT1R</b>                         |                         |        |              |                   |   |
|                                     | pAP4(-)                 | AngII  |              | 6.4 $\pm$ 0.1     | 4 |
|                                     | pAP4(-)                 | AngII  | SQ29548      | 5.9 $\pm$ 0.1     | 4 |
|                                     | pAP4(-)                 | AngII  | Naproxen     | 5.8 $\pm$ 0.1     | 4 |
|                                     | pAP4(-)                 | AngII  | Flurbiprofen | 6.2 $\pm$ 0.2     | 4 |
|                                     | TP $\alpha$ R           | AngII  |              | 7.6 $\pm$ 0.1     | 4 |
|                                     | TP $\alpha$ R           | AngII  | SQ29548      | 6.5 $\pm$ 0.1     | 4 |
|                                     | TP $\alpha$ R           | AngII  | Naproxen     | 6.4 $\pm$ 0.1     | 4 |
|                                     | TP $\alpha$ R           | AngII  | Flurbiprofen | 6.7 $\pm$ 0.2     | 4 |
|                                     | TP $\alpha$ R R130V     | AngII  |              | 7.0 $\pm$ 0.1     | 4 |
| <b>TP<math>\alpha</math>R</b>       |                         |        |              |                   |   |
|                                     | pAP4(-)                 | U46619 |              | 8.9 $\pm$ 0.0     | 4 |
|                                     | AT1R                    | U46619 |              | 8.8 $\pm$ 0.1     | 4 |
| <b>TP<math>\alpha</math>R R130V</b> |                         |        |              |                   |   |
|                                     | pAP4(-)                 | U46619 |              | 7.1 $\pm$ 0.1     | 4 |
|                                     | AT1R                    | U46619 |              | 7.1 $\pm$ 0.5     | 4 |

NIH3T3 cells transiently transfected with human AT1R in combination with TP $\alpha$ R, the TP $\alpha$ R R130V, or empty vector and stimulated with AngII alone or in presence of TP $\alpha$ R inhibitors SQ29548, Naproxen, or Flurbiprofen. Also, TP $\alpha$ R in combination with either AT1R or empty vector stimulated with U46619, and the mutant TP $\alpha$ R130V in combination with AT1R or empty vector stimulated with U46619 are shown. The R-SAT analysis was performed as described in the materials and methods section. Data represent the mean  $\pm$  S.D of 4 independent experiments each performed in duplicate. doi:10.1371/journal.pone.0058890.t003

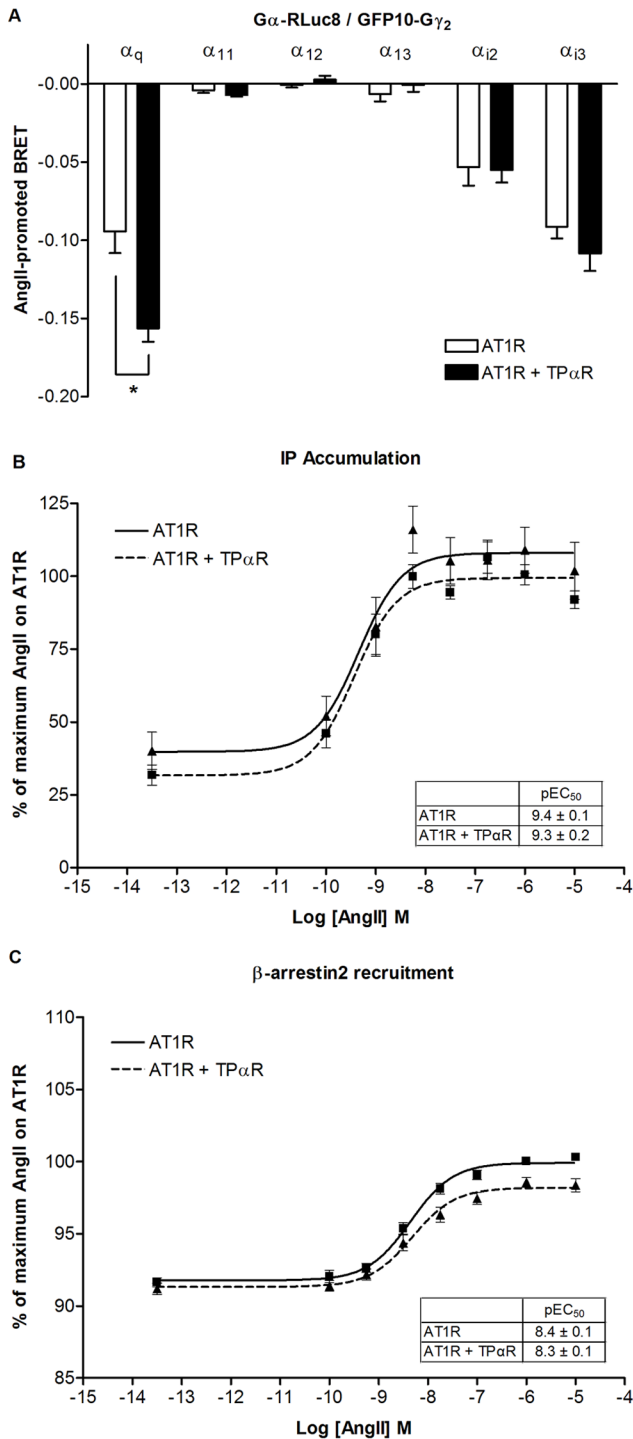

**Figure 4. Influence of TP $\alpha$ R on AT1R-mediated signal transduction in the “short term” assays.** **A**, BRET2 measured in HEK293 cells co-expressing the indicated G $\alpha$  subunit tagged with RLuc8 together with GFP10-G $\gamma$ 2 and G $\beta$ 1 in the absence of TP $\alpha$ R (grey bars) or in the presence of TP $\alpha$ R (black bars) and stimulated with AngII (1  $\mu$ M). Results are expressed as the difference in the BRET2 signal measured in the presence and the absence of agonist. Data represent the mean  $\pm$  S.E.M. of at least 3 independent experiments. \* indicates significant difference ( $P < 0.05$ ) as determined by Student’s t test. **B**, Concentration-response curves for AngII-induced IP accumulation in HEK293 cells are depicted as average curves ( $\pm 95\%$  confidence intervals) from at least three independent experiments performed in triplicate. Data are normalized to percentage of maximum AngII on the

AT1R alone. AT1R (2  $\mu$ g) was expressed alone or co-expressed with TP $\alpha$ R cDNA (2  $\mu$ g) together with empty vector to reach equal amounts of cDNA in all transfections. **C**, Concentration-response curves for AngII-induced BRET1 measured in real time in HEK293 cells co-expressing AT1R-Rluc and YFP- $\beta$ -arrestin2 in absence or presence of TP $\alpha$ R. Curves are depicted as average curves ( $\pm 95\%$  confidence intervals) from at least three independent experiments performed in duplicate. Data are normalized to percentage of maximum AngII on the AT1R alone. doi:10.1371/journal.pone.0058890.g004

and they have been shown to interact both *in vitro* and *in vivo*, which makes the interaction interesting from a physiological and pharmacological perspective.

Our R-SAT experiments suggest that long term AT1R activation mediates TP $\alpha$ R ligand synthesis leading to paracrine TP $\alpha$ R activation, which then results in an enhanced sensitivity to AngII. 1) The AngII-mediated response on the co-expression of AT1R and TP $\alpha$ R was completely abolished by the co-stimulation with either TP $\alpha$ R antagonist SQ29548 (Fig 2a) or COX inhibitors responsible for TP $\alpha$ R ligand synthesis (Fig. 2b–c). Although, we have not established the expression of thromboxane synthase that generates TXA2, several studies have established that NIH3T3 cells express all the necessary components for activating the TP $\alpha$ R. This includes arachidonic acid [44] and COX-1/2 [45,46] that are responsible for generating prostaglandin H2 (that in itself can work as an agonist on the TP receptor) [47,48]. 2) Co-expression of AT1R with a mutant TP $\alpha$ R R130V, deficient in G protein coupling, enhanced the potency of AngII signaling to a much lesser degree than did the wild-type TP $\alpha$ R (Fig. 2d).

On the other hand, the TP $\alpha$ R expression did not affect AT1R signaling in the short term assays. In the G protein BRET assay we did observe a change in the AngII induced BRET signal when the TP $\alpha$ R was present (Fig. 4a). However, most G protein responses were unaffected and the increased G $\alpha_q$  rearrangement did not translate into increased IP accumulation, which is the usual outcome of G $\alpha_q$  activation (Fig. 4b). One possible explanation could be that the G protein rearrangement observed in the BRET assay does not represent the canonical active conformation that results in accompanying G $\alpha_q$  mediated phosphatidylinositol production. In addition, the presence of TP $\alpha$ R did not affect the AT1R mediated  $\beta$ -arrestin recruitment (Fig. 4c), and the TP $\alpha$ R inhibitor does not influence the acute AngII-stimulated contraction in intra-renal arteries from mice (Fig 5b). Taken together, this data suggest that long term AT1R activation mediates TXA2 synthesis, which leads to paracrine TP $\alpha$ R activation in R-SAT assay whereas that does not occur in the short term assays we have tested. A recent study confirms the lack of acute vascular effect by AngII in TPR knockout vascular smooth muscle cells [49].

The functional relation between that AT1R and TP $\alpha$ R and the very complex and has not yet been fully elucidated. But it is well established, that the TP $\alpha$ R signalling is partly responsible for the development of AngII-mediated hypertension [38,50]. These studies also suggest that AT1R activation leads to TXA2 release followed by a paracrine TP $\alpha$ R activation. 1) Castillo-Hernandez et al. showed that the inotropic and vasoconstrictor effects by intracoronary AngII in hearts from Wistar rats are blocked by COX inhibitors and a competitive antagonist of TP $\alpha$ R, and the vasoconstriction effects by AngII were mimicked by infusion of U46619 [51]. 2) TP $\alpha$ R inhibitors reduced blood pressure in 2K1C Glodblatt hypertensive rats [38]. 3) Francois et al. observed a blunted pressure response in TP $\alpha$ R knockout (TP $\alpha$ R<sup>-/-</sup>) mice compared to wild type during chronic AngII infusion [50].



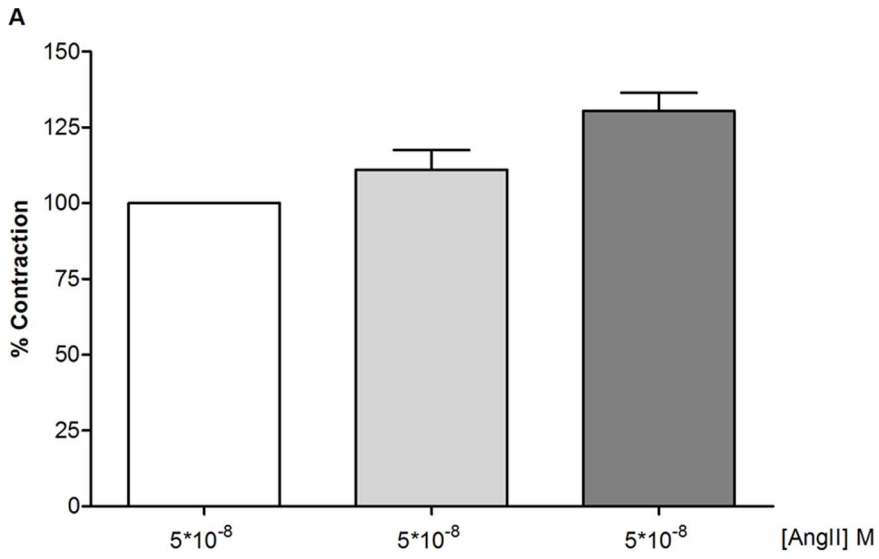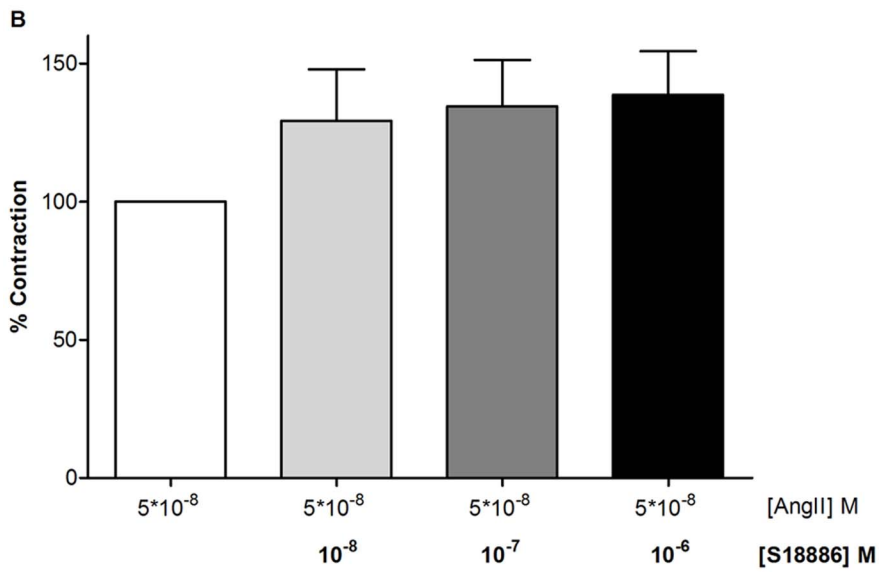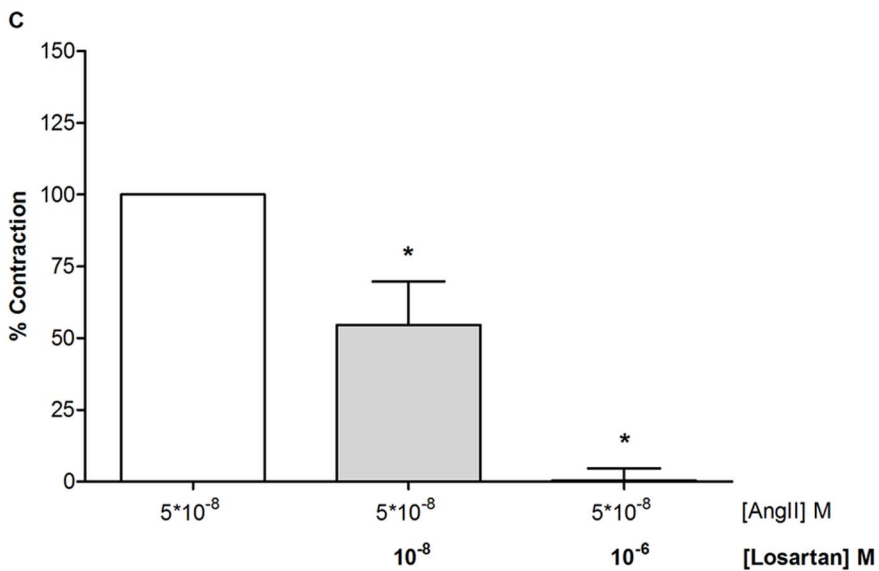

**Figure 5. Effect of administration of AngII to mouse intra-renal arteries.** **A**, Effect of three consecutive applications of AngII (AngII;  $5 \times 10^{-8}$  M). **B**, The experiment was repeated in the presence of S18886 ( $10^{-8}$ – $10^{-6}$  M), and **C**, in the presence of losartan ( $10^{-8}$ – $10^{-6}$  M). Data are expressed as percentage of the contraction to AngII (100%) and shown as means  $\pm$  S.E.M. Asterisks indicate a statistically significant inhibitory effect ( $P < 0.05$ ,  $n = 4$ ).  
doi:10.1371/journal.pone.0058890.g005

## Conclusion

We have performed a large functional screen to analyze for gain-of-function signaling between 7TM receptors, using the AT1R as a model receptor and looked at the ability of different 7TM receptors to enhance AngII-mediated AT1R responses in the R-SAT assay.

Surprisingly, our screen identified the TP $\alpha$ R as the only receptor that significantly potentiated the AngII response. While the screen identified a number of 7TM receptors that are able to decrease AT1R signaling, we only found one receptor that significantly enhanced AT1R potency. Our results suggest that functional enhancement through 7TM receptor cross-talk is a rare event that may require special conditions to arise. The functional relation between that AT1R and TP $\alpha$ R are very complex and has not yet been fully elucidated. Our data suggests that a long-term AT1R activation leads to a paracrine release of TXA<sub>2</sub> which then activates the TP $\alpha$ R signaling.

Cross-talk between 7TM receptors is an important aspect of 7TM receptor signaling and may have an important influence on the biological output. Even though our results indicate that cross-talk is not a common phenomenon, the functional interaction

between physiological relevant receptors has to be accounted for in modern drug development.

## Supporting Information

**Table S1** Pharmacological properties of AngII stimulation for the AT1R co-expressed with various 7TM receptors using R-SAT. NIH3T3 cells were transiently transfected with human AT1R alone or co-expressed with various 7TM receptors and the R-SAT analysis was performed as described in the materials and methods section. Fold increase in EC50 for the co-expression of various 7TM receptors together with the AT1R compared to the EC50 value for AT1R expressed alone when stimulated with AngII in each experiment are reported.

(DOC)

## Author Contributions

Conceived and designed the experiments: JTH CL PBLH CG DMW SPS ESB JLH. Performed the experiments: JTH TS PBLH JLH. Analyzed the data: JTH CL TS PBLH ESB JLH. Contributed reagents/materials/analysis tools: CG DMW SPS ESB. Wrote the paper: JTH CL ESB JLH.

## References

- Zaman MA, Oparil S, Calhoun DA (2002) Drugs targeting the renin-angiotensin-aldosterone system. *Nat Rev Drug Discov* 1: 621–636.
- Healey JS, Baranchuk A, Crystal E, Morillo CA, Garfinkle M, et al. (2005) Prevention of atrial fibrillation with angiotensin-converting enzyme inhibitors and angiotensin receptor blockers: a meta-analysis. *J Am Coll Cardiol* 45: 1832–1839.
- Burnier M, Brunner HR (2000) Angiotensin II receptor antagonists. *Lancet* 355: 637–645.
- Lyngso C, Erikstrup N, Hansen JL (2008) Functional interactions between 7TM receptors in the renin-angiotensin system—dimerization or crosstalk? *Mol Cell Endocrinol* 302: 203–212.
- Turu G, Varnai P, Gyombolai P, Szidonya L, Offertaler L, et al. (2009) Paracrine transactivation of the CB1 cannabinoid receptor by AT1 angiotensin and other Gq/11 protein-coupled receptors. *J Biol Chem* 284: 16914–16921.
- Lopez-Gimenez JF, Canals M, Pediani JD, Milligan G (2007) The alpha1b-adrenoceptor exists as a higher-order oligomer: effective oligomerization is required for receptor maturation, surface delivery, and function. *Mol Pharmacol* 71: 1015–1029.
- Terrillon S, Durroux T, Mouillac B, Breit A, Ayoub MA, et al. (2003) Oxytocin and Vasopressin V1a and V2 Receptors Form Constitutive Homo- and Heterodimers during Biosynthesis. *Mol Endocrinol* 17: 677–691.
- Milligan G (2006) G-protein-coupled receptor heterodimers: pharmacology, function and relevance to drug discovery. *Drug Discov Today* 11: 541–549.
- Hansen JL, Theilade J, Haunsø S, Sheikh SP (2004) Oligomerization of wild type and non-functional mutant Angiotensin II type I (AT1) receptors inhibits Gαq protein signaling but not ERK activation. *JBC* 279: 24108–24115.
- Karip E, Turu G, Supeki K, Szidonya L, Hunyady L (2007) Cross-inhibition of angiotensin AT1 receptors supports the concept of receptor oligomerization. *Neurochem Int* 51: 261–267.
- Abdalla S, Lother H, Langer A, El Faramawy Y, Quittner U (2004) Factor XIIIa Transglutaminase Crosslinks AT(1) Receptor Dimers of Monocytes at the Onset of Atherosclerosis. *Cell* 119: 343–354.
- Kostenis E, Milligan G, Christopoulos A, Sanchez-Ferrer CF, Heringer-Walther S, et al. (2005) G-protein-coupled receptor Mas is a physiological antagonist of the angiotensin II type 1 receptor. *Circulation* 111: 1806–1813.
- Canals M, Jenkins L, Kellett E, Milligan G (2006) Up-regulation of the Angiotensin II Type 1 Receptor by the MAS Proto-oncogene Is Due to Constitutive Activation of Gq/G11 by MAS. *J Biol Chem* 281: 16757–16767.
- Santos EL, Reis RI, Silva RG, Shimuta SI, Pecher C, et al. (2007) Functional rescue of a defective angiotensin II AT1 receptor mutant by the Mas protooncogene. *Regul Pept* 141: 159–167.
- Abdalla S, Lother H, Abdel-tawab AM, Quittner U (2001) The angiotensin II AT2 receptor is an AT1 receptor antagonist. *J Biol Chem* 276: 39721–39726.
- Porrello ER, Pflieger KD, Seeber RM, Qian H, Oro C, et al. (2011) Heteromerization of angiotensin receptors changes trafficking and arrestin recruitment profiles. *Cell Signal* 23: 1767–1776.
- Barki-Harrington L, Luttrell LM, Rockman HA (2003) Dual Inhibition of {beta}-Adrenergic and Angiotensin II Receptors by a Single Antagonist: A Functional Role for Receptor-Receptor Interaction In Vivo. *Circulation* 108: 1611–1618.
- Chun HJ, Ali ZA, Kojima Y, Kundu RK, Sheikh AY, et al. (2008) Apelin signaling antagonizes Ang II effects in mouse models of atherosclerosis. *J Clin Invest* 118: 3343–3354.
- Gonzalez-Hernandez Mde L, Godinez-Hernandez D, Bobadilla-Lugo RA, Lopez-Sanchez P (2010) Angiotensin-II type 1 receptor (AT1R) and alpha-1D adrenoceptor form a heterodimer during pregnancy-induced hypertension. *Auton Autacoid Pharmacol* 30: 167–172.
- Abdalla S, Lother H, Quittner U (2000) AT1-receptor heterodimers show enhanced G-protein activation and altered receptor sequestration. *Nature* 407: 94–98.
- Hansen JL, Hansen JT, Speerschneider T, Lyngso C, Erikstrup N, et al. (2009) Lack of evidence for AT1R/B2R heterodimerization in COS-7, HEK293, and NIH3T3 cells: how common is the AT1R/B2R heterodimer? *J Biol Chem* 284: 1831–1839.
- See HB, Seeber RM, Kocan M, Eidne KA, Pflieger KD (2010) Application of G protein-coupled receptor-heteromer identification technology to monitor beta-arrestin recruitment to G protein-coupled receptor heteromers. *Assay Drug Dev Technol* 9: 21–30.
- Zeng C, Luo Y, Asico LD, Hopfer U, Eisner GM, et al. (2003) Perturbation of D1 dopamine and AT1 receptor interaction in spontaneously hypertensive rats. *Hypertension* 42: 787–792.
- Zeng C, Asico LD, Wang X, Hopfer U, Eisner GM, et al. (2003) Angiotensin II regulation of AT1 and D3 dopamine receptors in renal proximal tubule cells of SHR. *Hypertension* 41: 724–729.
- Zeng C, Yang Z, Wang Z, Jones J, Wang X, et al. (2005) Interaction of angiotensin II type 1 and D5 dopamine receptors in renal proximal tubule cells. *Hypertension* 45: 804–810.
- Hansen JL, Aplin M, Hansen JT, Christensen GL, Bonde MM, et al. (2008) The human angiotensin AT(1) receptor supports G protein-independent extracellular signal-regulated kinase 1/2 activation and cellular proliferation. *Eur J Pharmacol* 590: 255–263.
- Brauner-Osborne H, Brann MR (1996) Pharmacology of muscarinic acetylcholine receptor subtypes (m1-m5): high throughput assays in mammalian cells. *Eur J Pharmacol* 295: 93–102.
- Hansen JL, Haunsø S, Brann MR, Sheikh SP, Weiner DM (2004) Loss-of-function polymorphic variants of the human angiotensin II type 1 receptor. *Mol Pharmacol* 65: 770–777.

29. Gales C, Rebois RV, Hogue M, Trieu P, Breit A, et al. (2005) Real-time monitoring of receptor and G-protein interactions in living cells. *Nat Methods* 2: 177–184.
30. Sauliere A, Bellot M, Paris H, Denis C, Finana F, et al. (2012) Deciphering biased-agonism complexity reveals a new active AT(1) receptor entity. *Nat Chem Biol*.
31. Burstein ES, Piu F, Ma JN, Weissman JT, Currier EA, et al. (2006) Integrative functional assays, chemical genomics and high throughput screening: harnessing signal transduction pathways to a common HTS readout. *Curr Pharm Des* 12: 1717–1729.
32. Weiner DM, Burstein ES, Nash N, Croston GE, Currier EA, et al. (2001) 5-hydroxytryptamine<sub>2A</sub> receptor inverse agonists as antipsychotics. *J Pharmacol Exp Ther* 299: 268–276.
33. Abramovitz M, Adam M, Boie Y, Carriere M, Denis D, et al. (2000) The utilization of recombinant prostanoid receptors to determine the affinities and selectivities of prostaglandins and related analogs. *Biochim Biophys Acta* 1483: 285–293.
34. Smith EF 3rd, Schmunk GA, Lefler AM (1981) Antagonism of thromboxane analog-induced vasoconstriction by non-steroidal anti-inflammatory agents. *J Cardiovasc Pharmacol* 3: 791–800.
35. Capra V, Veltri A, Foglia C, Crimaldi L, Habib A, et al. (2004) Mutational analysis of the highly conserved ERY motif of the thromboxane A<sub>2</sub> receptor: alternative role in G protein-coupled receptor signaling. *Mol Pharmacol* 66: 880–889.
36. Fredriksson R, Lagerstrom MC, Lundin LG, Schioth HB (2003) The G-protein-coupled receptors in the human genome form five main families. Phylogenetic analysis, paralogon groups, and fingerprints. *Mol Pharmacol* 63: 1256–1272.
37. Gales C, Van Durm JJ, Schaak S, Pontier S, Percherancier Y, et al. (2006) Probing the activation-promoted structural rearrangements in preassembled receptor-G protein complexes. *Nat Struct Mol Biol* 13: 778–786.
38. Wilcox CS, Cardozo J, Welch WJ (1996) AT<sub>1</sub> and TxA<sub>2</sub>/PGH<sub>2</sub> receptors maintain hypertension throughout 2K,1C Goldblatt hypertension in the rat. *Am J Physiol* 271: R891–896.
39. Kawada N, Dennehy K, Solis G, Modlinger P, Hamel R, et al. (2004) TP receptors regulate renal hemodynamics during angiotensin II slow pressor response. *Am J Physiol Renal Physiol* 287: F753–759.
40. Pin JP, Neubig R, Bouvier M, Devi L, Filizola M, et al. (2007) International Union of Basic and Clinical Pharmacology. LXVII. Recommendations for the recognition and nomenclature of G protein-coupled receptor heteromultimers. *Pharmacol Rev* 59: 5–13.
41. Rozenfeld R, Devi LA (2011) Exploring a role for heteromerization in GPCR signalling specificity. *Biochem J* 433: 11–18.
42. Miggin SM, Kinsella BT (1998) Expression and tissue distribution of the mRNAs encoding the human thromboxane A<sub>2</sub> receptor (TP) alpha and beta isoforms. *Biochim Biophys Acta* 1425: 543–559.
43. Oro C, Qian H, Thomas WG (2007) Type 1 angiotensin receptor pharmacology: signaling beyond G proteins. *Pharmacol Ther* 113: 210–226.
44. Pedersen SF, Poulsen KA, Lambert IH (2006) Roles of phospholipase A<sub>2</sub> isoforms in swelling- and melittin-induced arachidonic acid release and taurine efflux in NIH3T3 fibroblasts. *Am J Physiol Cell Physiol* 291: C1286–1296.
45. Espanol AJ, Goren N, Ribeiro ML, Sales ME Nitric oxide synthase 1 and cyclooxygenase-2 enzymes are targets of muscarinic activation in normal and inflamed NIH3T3 cells. *Inflamm Res* 59: 227–238.
46. Chien CC, Shen SC, Yang LY, Wu CY, Liao JS, et al. (2009) Activation of telomerase and cyclooxygenase-2 in PDGF and FGF inhibition of C2-ceramide-induced apoptosis. *J Cell Physiol* 218: 405–415.
47. Kelner MJ, Ugluk SF (1994) Mechanism of prostaglandin E<sub>2</sub> release and increase in PGH<sub>2</sub>/PGE<sub>2</sub> isomerase activity by PDGF: involvement of nitric oxide. *Arch Biochem Biophys* 312: 240–243.
48. Bachschmid M, Thurau S, Zou MH, Ullrich V (2003) Endothelial cell activation by endotoxin involves superoxide/NO-mediated nitration of prostacyclin synthase and thromboxane receptor stimulation. *Faseb J* 17: 914–916.
49. Sparks MA, Makhanova NA, Griffiths RC, Snouwert JN, Koller BH, et al. (2013) Thromboxane receptors in smooth muscle promote hypertension, vascular remodeling, and sudden death. *Hypertension* 61: 166–173.
50. Francois H, Athirakul K, Mao L, Rockman H, Coffman TM (2004) Role for thromboxane receptors in angiotensin-II-induced hypertension. *Hypertension* 43: 364–369.
51. Castillo-Hernandez JR, Rubio-Gayosso I, Sada-Ovalle I, Garcia-Vazquez A, Ceballos G, et al. (2004) Intracoronary angiotensin II causes inotropic and vascular effects via different paracrine mechanisms. *Vascul Pharmacol* 41: 147–158.
